# Supplementary material for: Detecting cell-type-specific allelic expression imbalance by integrative analysis of bulk and single-cell RNA sequencing data
Source: PLoS Genet. 2021 Mar 4;17(3):e1009080. doi: 10.1371/journal.pgen.1009080 (PMC7963069; doi:10.1371/journal.pgen.1009080)
Supplement: S3 Table — We applied BSCET to the Bunt pancreatic islets bulk RNA-seq data [27] using the MuSiC [14] proportion estimates obtained from the Segerstolpe single-cell reference [16]. We detected 678 SNPs across 405 genes with significant cell-type-specific AEI (FDR adjusted P-value < 0.05). (XLSX) [file pgen.1009080.s013.xlsx]

## Sheet: BSCET
SNP	Gene	Cell Type	P-value	FDR Adjusted P-value
chr1:104296264	AMY1A,AMY1B,AMY1C	acinar	0.00100395	0.0422525
chr1:108678732	SLC25A24	beta	1.51766e-05	0.00126247
chr1:109748779	KIAA1324	ductal	0.00140059	0.0444794
chr1:109884775	SORT1	beta	0.00057626	0.0211041
chr1:120612154	NOTCH2	ductal	0.00011431	0.00666859
chr1:120612163	NOTCH2	ductal	0.000105099	0.00641427
chr1:121129557	SRGAP2B,SRGAP2C	beta	1.13306e-05	0.000988296
chr1:121129695	SRGAP2B,SRGAP2C	beta	9.49783e-05	0.0050591
chr1:121129843	SRGAP2D	beta	2.23551e-07	3.5864e-05
chr1:135816	LOC729737	acinar	0.000191969	0.0117323
chr1:135913	LOC729737	acinar	0.000949138	0.0409955
chr1:143744411	LINC01138	beta	0.000938397	0.0298956
chr1:144188366	NBPF19,NBPF20	beta	0.00163913	0.0455913
chr1:144340621	LINC00623,LINC00869	beta	0.000214341	0.00948192
chr1:144340681	LINC00623,LINC00869	beta	6.59262e-11	3.29045e-08
chr1:144340743	LINC00623,LINC00869	ductal	0.0010965	0.0378884
chr1:144598641	NBPF8	ductal	0.00116681	0.0392158
chr1:144829580	NBPF8,NBPF9	ductal	0.00149833	0.0463659
chr1:144829799	NBPF8,NBPF9	beta	4.05197e-09	1.17429e-06
chr1:144829799	NBPF8,NBPF9	ductal	0.00147161	0.0459061
chr1:144829799	NBPF8,NBPF9	acinar	2.81701e-07	5.88559e-05
chr1:144829808	NBPF8,NBPF9	beta	3.88914e-06	0.000406832
chr1:144829808	NBPF8,NBPF9	ductal	2.65613e-06	0.000361556
chr1:144829808	NBPF8,NBPF9	acinar	5.56857e-09	2.0845e-06
chr1:144830050	NBPF8,NBPF9	beta	0.000844488	0.0279959
chr1:144830050	NBPF8,NBPF9	ductal	2.30934e-10	1.15262e-07
chr1:144830050	NBPF8,NBPF9	acinar	0.000974273	0.0414828
chr1:144855812	PDE4DIP	beta	0.00151803	0.0431581
chr1:144855866	PDE4DIP	beta	0.00138603	0.040429
chr1:144879090	PDE4DIP	beta	0.000126073	0.00621304
chr1:144912233	PDE4DIP	beta	3.27776e-11	1.96316e-08
chr1:144915561	PDE4DIP	alpha	2.33236e-05	0.0261924
chr1:144915561	PDE4DIP	beta	1.20939e-10	5.43256e-08
chr1:144915624	PDE4DIP	beta	3.98978e-11	2.24026e-08
chr1:144916748	PDE4DIP	alpha	2.5946e-09	2.33099e-05
chr1:144916748	PDE4DIP	beta	1.8971e-13	2.13045e-10
chr1:144917546	PDE4DIP	alpha	4.19087e-05	0.034228
chr1:144917546	PDE4DIP	beta	3.15382e-13	3.14821e-10
chr1:144918957	PDE4DIP	beta	1.04519e-10	4.9421e-08
chr1:144930940	PDE4DIP	beta	1.13504e-06	0.000145674
chr1:144931330	PDE4DIP	beta	2.51092e-05	0.00184903
chr1:144931392	PDE4DIP	beta	1.5003e-05	0.00125969
chr1:144952207	PDE4DIP	beta	3.44272e-07	5.33266e-05
chr1:144952220	PDE4DIP	beta	1.42789e-11	9.16295e-09
chr1:144952641	PDE4DIP	beta	3.93972e-06	0.000406832
chr1:144952687	PDE4DIP	beta	2.19788e-06	0.000246974
chr1:144955288	PDE4DIP	beta	1.04315e-09	3.74865e-07
chr1:144994658	PDE4DIP	beta	2.11594e-09	6.78913e-07
chr1:145015877	PDE4DIP	beta	4.76631e-05	0.00295314
chr1:145021150	PDE4DIP	beta	5.20664e-09	1.39832e-06
chr1:145039633	LOC100996724	beta	0.00010654	0.00543838
chr1:145039821	LOC100996724	beta	9.51679e-05	0.0050591
chr1:145039866	LOC100996724	beta	0.000126557	0.00621304
chr1:145112414	SEC22B	beta	2.46638e-14	3.16542e-11
chr1:145112414	SEC22B	ductal	0.00028317	0.0137513
chr1:145112414	SEC22B	acinar	8.71117e-10	4.34784e-07
chr1:145112420	SEC22B	beta	0.000113467	0.00571638
chr1:145112428	SEC22B	beta	4.77133e-15	1.07164e-11
chr1:145112428	SEC22B	ductal	5.22291e-05	0.00379199
chr1:145112428	SEC22B	acinar	6.42103e-11	4.43742e-08
chr1:145112485	SEC22B	beta	5.7598e-12	4.32575e-09
chr1:145112485	SEC22B	ductal	0.000352292	0.0161479
chr1:145273302	NOTCH2NL	ductal	4.40433e-07	8.41884e-05
chr1:145273345	NOTCH2NL	ductal	3.36139e-08	1.07853e-05
chr1:145273431	NOTCH2NL	ductal	0.00131952	0.0429189
chr1:145281408	NOTCH2NL	ductal	9.77445e-08	2.43927e-05
chr1:145281543	NOTCH2NL	ductal	3.97476e-05	0.0030262
chr1:145316577	NBPF10,NBPF19,NBPF20	ductal	0.00157286	0.0482272
chr1:145318972	NBPF10,NBPF19,NBPF20	ductal	8.79863e-05	0.00560616
chr1:145322841	NBPF10	ductal	0.000149419	0.00808663
chr1:145331589	NBPF10,NBPF20	ductal	8.55934e-05	0.00553217
chr1:145344984	NBPF10,NBPF19,NBPF20	beta	0.00041293	0.0163426
chr1:145345739	NBPF10,NBPF19,NBPF20	beta	0.000841703	0.0279959
chr1:145345739	NBPF10,NBPF19,NBPF20	ductal	2.53303e-06	0.000352716
chr1:145347291	NBPF10,NBPF19,NBPF20	ductal	0.000977073	0.0348493
chr1:145349709	NBPF10,NBPF19,NBPF20	ductal	0.00135597	0.0436633
chr1:145349714	NBPF10,NBPF19,NBPF20	ductal	0.000895688	0.0329789
chr1:145350469	NBPF10,NBPF19,NBPF20	ductal	1.03836e-08	4.44222e-06
chr1:145352021	NBPF10,NBPF19,NBPF20	ductal	0.00110793	0.0381365
chr1:145363015	NBPF10,NBPF20	ductal	6.90516e-07	0.000124072
chr1:146448501	NBPF10,NBPF12,NBPF19,NBPF20	beta	2.52211e-09	7.81332e-07
chr1:146448501	NBPF10,NBPF12,NBPF19,NBPF20	ductal	5.20402e-06	0.00061517
chr1:146450892	NBPF10	beta	4.83199e-10	1.80878e-07
chr1:146450892	NBPF10	ductal	1.95918e-06	0.000298327
chr1:147575132	NBPF11	beta	1.28675e-05	0.00110097
chr1:147575150	NBPF11	beta	8.79135e-08	1.54866e-05
chr1:147575441	NBPF11	beta	8.88235e-13	7.97991e-10
chr1:147575441	NBPF11	ductal	1.20367e-07	2.84572e-05
chr1:147575441	NBPF11	acinar	2.47567e-06	0.000358733
chr1:147575603	NBPF11	beta	4.00643e-09	1.17429e-06
chr1:147575603	NBPF11	ductal	2.60758e-07	5.44803e-05
chr1:147575603	NBPF11	acinar	0.000256428	0.0147676
chr1:147575678	NBPF11	beta	5.77793e-12	4.32575e-09
chr1:147575678	NBPF11	acinar	5.90784e-06	0.000727069
chr1:147575893	NBPF11	beta	6.93859e-05	0.00387182
chr1:148003749	NBPF26	acinar	0.00104979	0.0436635
chr1:148003752	NBPF26	ductal	0.000169977	0.00903593
chr1:148003856	NBPF26	ductal	8.81938e-11	5.65952e-08
chr1:148004043	NBPF26	beta	4.35998e-10	1.70305e-07
chr1:148004043	NBPF26	ductal	4.33072e-08	1.25685e-05
chr1:148004043	NBPF26	acinar	4.82346e-06	0.000610338
chr1:148007054	NBPF26	ductal	0.000116172	0.00673348
chr1:148010942	NBPF19,NBPF26	ductal	0.000510545	0.0214333
chr1:148011037	NBPF19,NBPF26	ductal	0.000467355	0.019856
chr1:148013335	NBPF26	ductal	0.00115542	0.0391709
chr1:14815	WASH7P	acinar	0.000515652	0.0258806
chr1:149576545	LINC00623,LINC00869,LOC103091866	beta	1.13693e-07	1.9272e-05
chr1:149913513	OTUD7B	beta	0.000437422	0.0170861
chr1:149913513	OTUD7B	ductal	0.00102674	0.035892
chr1:150597261	ENSA	beta	8.65677e-05	0.00468508
chr1:150705248	CTSS	ductal	0.000192774	0.00989646
chr1:151374340	PSMB4	beta	0.00031232	0.0128135
chr1:154129194	TPM3	ductal	8.13149e-05	0.00536056
chr1:154129194	TPM3	acinar	5.45231e-05	0.00415115
chr1:154226458	UBAP2L	beta	7.01171e-08	1.31236e-05
chr1:154226458	UBAP2L	ductal	3.64785e-08	1.13008e-05
chr1:154226458	UBAP2L	acinar	4.80903e-05	0.00382503
chr1:156106973	LMNA	acinar	0.000753926	0.0341105
chr1:160966351	F11R	ductal	7.52001e-08	1.93028e-05
chr1:160966352	F11R	ductal	6.94697e-08	1.83563e-05
chr1:160966353	F11R	ductal	2.71389e-07	5.54126e-05
chr1:160966434	F11R	acinar	6.5748e-06	0.000798216
chr1:160967833	F11R	ductal	0.000229111	0.0114977
chr1:162494683	UHMK1	beta	0.000112948	0.00571638
chr1:162498599	UHMK1	beta	5.06913e-05	0.00305645
chr1:1653093	CDK11A,CDK11B	beta	5.72875e-05	0.00329917
chr1:1653093	CDK11A,CDK11B	acinar	0.00115589	0.0462983
chr1:16895634	NBPF1	beta	0.000584944	0.0211901
chr1:16996	WASH7P	beta	0.00139112	0.0404461
chr1:16996	WASH7P	ductal	0.000105667	0.00641427
chr1:17716	WASH7P	ductal	0.000466928	0.019856
chr1:17730	WASH7P	ductal	0.000318687	0.0148346
chr1:18030	WASH7P	beta	0.000221207	0.00960059
chr1:183113862	LAMC1	ductal	0.000369857	0.0165573
chr1:183113952	LAMC1	ductal	1.46068e-06	0.000247599
chr1:19585553	MRTO4	acinar	1.98581e-05	0.00191833
chr1:204525548	MDM4	ductal	1.1457e-05	0.0011188
chr1:205759876	SLC41A1	ductal	0.00103825	0.0361535
chr1:206578650	SRGAP2	beta	6.2204e-06	0.000604826
chr1:206579798	SRGAP2	beta	6.65403e-05	0.00373624
chr1:206579936	SRGAP2D	beta	5.82887e-06	0.000581851
chr1:20978564	PINK1-AS	acinar	0.000708273	0.0329284
chr1:21544791	ECE1	beta	0.00132773	0.0393675
chr1:21544791	ECE1	acinar	0.00124959	0.0485989
chr1:215793834	KCTD3	beta	5.28856e-05	0.00314652
chr1:22336308	CELA3A	acinar	3.53072e-05	0.00302095
chr1:223962879	CAPN2	ductal	1.07912e-11	8.07901e-09
chr1:224575018	WDR26	alpha	4.98846e-05	0.0344741
chr1:226171400	SDE2	ductal	0.000805743	0.0304675
chr1:230845794	AGT	alpha	3.42093e-05	0.0341484
chr1:230845794	AGT	beta	7.08794e-06	0.000673254
chr1:232534957	SIPA1L2	beta	0.0012593	0.0379648
chr1:24289057	PNRC2	ductal	1.03939e-05	0.00105444
chr1:24786	WASH7P	ductal	0.000637184	0.0253295
chr1:25894853	LDLRAP1	beta	0.000815432	0.0274376
chr1:26801762	HMGN2	beta	0.000455258	0.0175863
chr1:26801762	HMGN2	ductal	1.02127e-07	2.47976e-05
chr1:28826085	PHACTR4	beta	0.000456101	0.0175863
chr1:324298	LOC100132062,LOC100132287,LOC100133331	ductal	0.000900666	0.0330269
chr1:324332	LOC100132062,LOC100132287,LOC100133331	ductal	2.83174e-06	0.000370526
chr1:325779	LOC100132062,LOC100132287,LOC100133331	beta	0.000203795	0.00915447
chr1:325779	LOC100132062,LOC100132287,LOC100133331	acinar	0.000207023	0.0124825
chr1:36067677	PSMB2	ductal	9.38154e-06	0.000980044
chr1:36067677	PSMB2	acinar	0.0002275	0.0134501
chr1:36067749	PSMB2	ductal	2.22531e-06	0.000322454
chr1:36067760	PSMB2	ductal	2.29479e-07	4.90866e-05
chr1:36067784	PSMB2	ductal	8.30016e-05	0.00540352
chr1:36067817	PSMB2	beta	0.000211131	0.00939009
chr1:36067925	PSMB2	ductal	9.06754e-05	0.00569669
chr1:36068166	PSMB2	ductal	0.00027658	0.0135781
chr1:36068231	PSMB2	ductal	0.000461035	0.0198179
chr1:36068295	PSMB2	ductal	0.00160889	0.0491643
chr1:36068325	PSMB2	ductal	0.000756967	0.0291871
chr1:3696890	LRRC47	beta	0.000531067	0.0197971
chr1:3697137	LRRC47	beta	0.00186296	0.0498121
chr1:38449910	SF3A3	beta	0.00134611	0.0396561
chr1:40041482	PABPC4	acinar	1.3935e-19	1.25192e-15
chr1:45976996	PRDX1	ductal	0.000294504	0.0140736
chr1:59041903	TACSTD2	ductal	3.48199e-05	0.00267369
chr1:6282587	ICMT	beta	3.85109e-07	5.76637e-05
chr1:6282587	ICMT	acinar	9.15277e-07	0.000164457
chr1:662182	LOC100133331	ductal	1.57229e-06	0.000256826
chr1:662182	LOC100133331	acinar	5.47101e-07	0.000102399
chr1:662279	LOC100133331	ductal	3.33688e-05	0.00258436
chr1:662279	LOC100133331	acinar	6.66201e-05	0.00486597
chr10:101992425	CWF19L1	ductal	0.000400701	0.0176466
chr10:101992425	CWF19L1	acinar	0.000525206	0.0260688
chr10:102121601	SCD	beta	4.32544e-10	1.70305e-07
chr10:102121840	SCD	beta	1.78591e-08	3.91332e-06
chr10:115887231	CCDC186	beta	0.000468287	0.0179025
chr10:119038759	SLC18A2	alpha	6.92607e-06	0.0103706
chr10:119134058	PDZD8	beta	0.000495569	0.0187067
chr10:133781798	BNIP3	acinar	2.63656e-05	0.00234523
chr10:51381453	TIMM23B	ductal	1.33241e-08	5.44108e-06
chr10:51381481	TIMM23B	ductal	6.87034e-06	0.000762014
chr10:51381519	TIMM23B	ductal	2.07428e-10	1.0962e-07
chr10:51381775	TIMM23B	ductal	6.30086e-14	9.43449e-11
chr10:51381836	TIMM23B	ductal	6.14509e-14	9.43449e-11
chr10:51387654	TIMM23B	ductal	2.08592e-15	4.68498e-12
chr10:51607097	TIMM23	beta	7.98698e-05	0.0043753
chr10:51607097	TIMM23	ductal	4.69843e-16	1.40702e-12
chr10:51612914	TIMM23	beta	0.000653612	0.0228484
chr10:51612914	TIMM23	ductal	3.83911e-17	1.72453e-13
chr10:51612975	TIMM23	beta	2.88219e-05	0.00202294
chr10:51612975	TIMM23	ductal	3.42243e-19	3.07471e-15
chr10:51612975	TIMM23	acinar	0.000185702	0.011427
chr10:51613231	TIMM23	beta	0.000874389	0.0287748
chr10:51613231	TIMM23	ductal	8.67278e-12	7.0833e-09
chr10:51613269	TIMM23	ductal	0.000603818	0.0245462
chr10:51613297	TIMM23	ductal	2.75841e-08	9.91263e-06
chr10:51623190	TIMM23	ductal	0.000366324	0.0165573
chr10:51885859	WASHC2A	ductal	0.000230363	0.0114977
chr10:61551428	CCDC6	beta	0.00095729	0.0302827
chr10:64566258	ADO	beta	0.000622305	0.0220006
chr10:73581769	PSAP;PSAP	beta	1.05669e-22	9.49329e-19
chr10:73581769	PSAP;PSAP	ductal	0.000820598	0.0308462
chr10:82192318	FAM213A	beta	1.58348e-06	0.000192243
chr10:82192318	FAM213A	acinar	0.000731856	0.0333756
chr10:88684586	BMPR1A	beta	9.35026e-06	0.00083889
chr10:88684679	BMPR1A	beta	4.37622e-05	0.00273028
chr10:88684762	BMPR1A	beta	0.000418142	0.0164291
chr10:97447373	TCTN3	acinar	1.05006e-05	0.00117218
chr11:111896324	DLAT	ductal	0.000782701	0.0297957
chr11:117690918	FXYD2,FXYD6-FXYD2	acinar	0.000409247	0.022016
chr11:118915944	HYOU1	beta	0.000312351	0.0128135
chr11:118967524	DPAGT1	beta	1.80982e-06	0.000211162
chr11:118967758	DPAGT1	beta	0.00132093	0.0392956
chr11:125452304	EI24	beta	1.11517e-07	1.92667e-05
chr11:127626	LINC01001	ductal	0.00163214	0.0496123
chr11:128030	LINC01001	ductal	9.35948e-05	0.00578534
chr11:128030	LINC01001	acinar	2.37388e-05	0.00215424
chr11:128127	LINC01001	ductal	4.64886e-05	0.00345169
chr11:128127	LINC01001	acinar	1.05949e-05	0.00117218
chr11:17096724	RPS13	acinar	0.000711055	0.0329284
chr11:1782594	CTSD	ductal	0.00140458	0.0444794
chr11:2182224	INS	beta	0.00158627	0.0446742
chr11:2966293	NAP1L4	beta	2.93428e-05	0.00204354
chr11:33728614	CD59	ductal	0.000109061	0.00653205
chr11:34668143	EHF	alpha	3.88265e-05	0.034228
chr11:57463500	ZDHHC5	beta	0.000351785	0.0141723
chr11:61569306	FADS1	acinar	0.000634942	0.0303421
chr11:61732868	FTH1	ductal	0.000312198	0.0146847
chr11:61732868	FTH1	acinar	9.60927e-08	2.6978e-05
chr11:65273630	MALAT1,MASCRNA,TALAM1	alpha	1.17761e-05	0.0151138
chr11:65544381	AP5B1	ductal	0.000394769	0.0175574
chr11:65544523	AP5B1	ductal	0.000576695	0.0237662
chr11:68660885	MRPL21	beta	0.000668654	0.0231938
chr11:68660885	MRPL21	acinar	9.28071e-06	0.00108583
chr11:727310	EPS8L2	ductal	0.000939466	0.0339898
chr11:75116660	RPS3	acinar	2.31803e-05	0.00214692
chr11:89936593	CHORDC1	alpha	1.75158e-07	0.000524538
chr11:89936593	CHORDC1	acinar	0.000449103	0.0231882
chr12:108954862	SART3	ductal	0.000288815	0.0139232
chr12:112278192	MAPKAPK5-AS1	beta	2.99803e-05	0.00207187
chr12:117152433	C12orf49	beta	0.000544357	0.0202087
chr12:117152985	C12orf49	acinar	0.00116467	0.0462983
chr12:120565188	GCN1	acinar	0.000462719	0.0236197
chr12:120634690	RPLP0	acinar	0.000120915	0.00787173
chr12:120634707	RPLP0	ductal	2.06935e-05	0.0018407
chr12:120634707	RPLP0	acinar	1.23223e-13	1.58148e-10
chr12:120899513	GATC,SRSF9	beta	0.000228508	0.00986977
chr12:123350793	VPS37B	ductal	0.000942058	0.0339898
chr12:125396488	UBC	beta	0.00129225	0.0387053
chr12:125396488	UBC	ductal	0.000194198	0.00991293
chr12:125396833	UBC	ductal	1.36257e-05	0.00129134
chr12:125397541	UBC	ductal	2.86197e-06	0.000370526
chr12:125397895	UBC	ductal	3.05277e-05	0.00242708
chr12:133346564	GOLGA3	beta	0.000494434	0.0187067
chr12:41464003	CNTN1	beta	0.00167131	0.0462
chr12:49522238	TUBA1B	beta	6.22578e-05	0.00354002
chr12:49522238	TUBA1B	ductal	0.000126431	0.00728114
chr12:49522238	TUBA1B	acinar	1.06988e-05	0.00117218
chr12:49523049	TUBA1B	beta	0.00136226	0.0399953
chr12:49666182	TUBA1C	ductal	0.000468552	0.019856
chr12:49666509	TUBA1C	ductal	0.000408645	0.0179086
chr12:50152191	TMBIM6	beta	2.46679e-07	3.888e-05
chr12:50152191	TMBIM6	ductal	2.1804e-08	8.41262e-06
chr12:50152191	TMBIM6	acinar	2.15506e-05	0.00203801
chr12:50570519	LIMA1	acinar	0.00129452	0.0499178
chr12:51380232	SLC11A2	beta	0.000902595	0.0292197
chr12:51453637	LETMD1	beta	0.00179741	0.0486383
chr12:51453682	LETMD1	beta	0.000182856	0.0083815
chr12:53294382	KRT8	ductal	4.35904e-12	4.3513e-09
chr12:53294382	KRT8	acinar	0.00064931	0.0308646
chr12:53294385	KRT8	ductal	1.6217e-06	0.000260167
chr12:56510416	RPL41	beta	8.78029e-05	0.00472348
chr12:56510420	RPL41	beta	0.00145498	0.041762
chr12:56510420	RPL41	ductal	0.000354434	0.0161636
chr12:56510420	RPL41	acinar	1.00576e-06	0.000177172
chr12:57106660	NACA	beta	0.00140906	0.0408083
chr12:57106660	NACA	ductal	0.00100923	0.0355567
chr12:57489648	STAT6	acinar	0.000678071	0.032062
chr12:6450945	TNFRSF1A	beta	0.00062446	0.0220006
chr12:6879593	PTMS	beta	3.22486e-08	6.73771e-06
chr12:6879593	PTMS	ductal	0.000154074	0.00828862
chr12:69237534	MDM2	beta	3.13646e-05	0.00213469
chr12:74934743	ATXN7L3B	beta	2.76288e-05	0.00198574
chr12:76441446	NAP1L1	ductal	0.00140607	0.0444794
chr12:89794	LOC100288778	acinar	0.000695225	0.0325307
chr12:89806	LOC100288778	beta	2.69964e-05	0.00195594
chr12:89806	LOC100288778	acinar	0.000845763	0.0372855
chr12:93793535	NUDT4P1,NUDT4P2	beta	0.000584631	0.0211901
chr12:93793785	NUDT4P1,NUDT4P2	beta	1.77101e-07	2.89286e-05
chr12:93795346	NUDT4P1,NUDT4P2	beta	0.00165492	0.0458883
chr12:98942621	TMPO	acinar	0.000230557	0.0134501
chr13:110407815	IRS2	beta	0.00153752	0.0435743
chr13:110802123	COL4A1	beta	3.38357e-05	0.00225226
chr13:110813709	COL4A1	beta	5.74451e-06	0.000579873
chr13:114154419	TMCO3	acinar	3.42409e-05	0.0029866
chr13:20246402	MPHOSPH8	beta	1.88462e-05	0.0014723
chr13:20247024	MPHOSPH8	beta	3.89693e-08	7.78e-06
chr13:20247024	MPHOSPH8	acinar	8.2911e-05	0.00586514
chr13:20247075	MPHOSPH8	beta	3.68869e-05	0.00241032
chr13:20247116	MPHOSPH8	beta	0.000218085	0.00951105
chr13:46090371	COG3	beta	1.35596e-16	4.06064e-13
chr13:46090371	COG3	ductal	3.45686e-06	0.000431339
chr13:46090371	COG3	acinar	2.88131e-06	0.000407794
chr13:50107289	RCBTB1	beta	0.000268264	0.0113683
chr13:50107323	RCBTB1	beta	5.39599e-05	0.00318931
chr13:99105395	STK24	beta	3.0344e-05	0.002081
chr14:101295723	MEG3	acinar	0.000105683	0.00703771
chr14:103603569	TNFAIP2	ductal	0.000446895	0.0193024
chr14:105270278	ZBTB42	acinar	4.89985e-05	0.00386142
chr14:20928434	TMEM55B	beta	0.000274944	0.0115425
chr14:35522530	FAM177A1	beta	0.000878204	0.0287948
chr14:53242354	GNPNAT1	ductal	0.000779189	0.0297882
chr14:53242354	GNPNAT1	acinar	9.16245e-11	5.87968e-08
chr14:53242417	GNPNAT1	acinar	5.22471e-07	9.98698e-05
chr14:53242425	GNPNAT1	acinar	2.61808e-05	0.00234523
chr14:53242639	GNPNAT1	acinar	1.03783e-05	0.00117218
chr14:53242859	GNPNAT1	beta	0.000735388	0.0250255
chr14:53242859	GNPNAT1	acinar	2.06413e-05	0.00197278
chr14:53243394	GNPNAT1	acinar	2.95042e-06	0.000407794
chr14:53243545	GNPNAT1	acinar	0.000180328	0.0111729
chr14:53243546	GNPNAT1	acinar	1.60862e-07	4.01441e-05
chr14:65400069	CHURC1	beta	2.13892e-05	0.00161479
chr14:70178337	SUSD6	ductal	0.000711357	0.0277862
chr14:75202734	FCF1	beta	0.000104147	0.0054326
chr14:75202856	FCF1	acinar	0.000755564	0.0341105
chr14:75202857	FCF1	acinar	0.000103532	0.00703771
chr14:77801654	TMED8	beta	0.000688269	0.0236912
chr14:95081081	SERPINA3	ductal	6.63103e-05	0.0046908
chr15:102182183	TM2D3	beta	6.1822e-05	0.00353763
chr15:102513138	WASH3P	acinar	0.00115919	0.0462983
chr15:23611915	GOLGA8S	beta	0.000904172	0.0292197
chr15:34673722	GOLGA8A	acinar	0.000377621	0.0206863
chr15:34674183	GOLGA8A	acinar	9.30644e-06	0.00108583
chr15:34674266	GOLGA8A	acinar	3.07662e-05	0.00270984
chr15:34674657	GOLGA8A	acinar	2.05803e-07	4.74085e-05
chr15:34675050	GOLGA8A	acinar	8.41499e-05	0.00588316
chr15:34680037	GOLGA8A	acinar	0.000560369	0.0276247
chr15:34820487	GOLGA8B	acinar	0.000628746	0.0302067
chr15:34820878	GOLGA8B	acinar	0.00017601	0.0110579
chr15:34821271	GOLGA8B	acinar	4.61562e-06	0.000592382
chr15:34821373	GOLGA8B	acinar	0.000319154	0.0176993
chr15:34823738	GOLGA8B	acinar	3.92751e-06	0.000518893
chr15:34826258	GOLGA8B	acinar	0.00105666	0.0437469
chr15:41590861	OIP5-AS1	ductal	0.000747472	0.0289452
chr15:41591451	OIP5-AS1	ductal	0.00120858	0.0402137
chr15:42859382	HAUS2	ductal	7.09997e-05	0.00486917
chr15:44058928	PDIA3	beta	0.000384916	0.0153976
chr15:49419124	COPS2	ductal	0.000142005	0.0077791
chr15:52840809	ARPP19	ductal	0.000623648	0.0249016
chr15:66791973	RPL4	acinar	0.00123036	0.0482689
chr15:80263406	BCL2A1	beta	5.65455e-05	0.00327745
chr15:80263406	BCL2A1	ductal	0.00142059	0.0445311
chr15:83205515	RPS17	acinar	5.21283e-05	0.00400274
chr15:83209192	RPS17	acinar	0.0004997	0.0252638
chr15:85748147	LOC642423	ductal	0.000609283	0.0246567
chr15:91452595	MAN2A2	beta	0.000893794	0.0290936
chr16:11769948	SNN	ductal	7.07042e-05	0.00486917
chr16:11928736	RSL1D1	beta	0.00157846	0.044594
chr16:11969724	GSPT1	ductal	0.000318381	0.0148346
chr16:15042814	NPIPA1	beta	0.000572636	0.0210843
chr16:16381696	NOMO3	acinar	1.47857e-05	0.00152683
chr16:16388513	NOMO3	beta	5.4761e-05	0.00321095
chr16:16388513	NOMO3	acinar	4.28194e-12	3.8469e-09
chr16:16417061	PKD1P1,PKD1P4-NPIPA8	acinar	0.00110489	0.0451198
chr16:16422877	PKD1P1	beta	0.00114732	0.0348654
chr16:16427604	PKD1P1	beta	0.00129247	0.0387053
chr16:16427604	PKD1P1	ductal	1.88608e-06	0.000292148
chr16:16427604	PKD1P1	acinar	0.000588725	0.0285897
chr16:1822159	MRPS34	acinar	3.73607e-05	0.00316649
chr16:18439320	PKD1P4-NPIPA8	beta	3.70241e-05	0.00241032
chr16:18439320	PKD1P4-NPIPA8	acinar	0.000110415	0.00729386
chr16:18511337	NOMO2	beta	1.63608e-06	0.000195981
chr16:18511337	NOMO2	acinar	1.4622e-14	2.62727e-11
chr16:2014528	RPS2	acinar	0.000443978	0.0231882
chr16:21413801	NPIPB3	beta	0.000232837	0.00996098
chr16:21415540	NPIPB3	ductal	7.45309e-05	0.00503448
chr16:21422267	NPIPB3	beta	0.000613864	0.0219719
chr16:21846235	NPIPB4	beta	0.000942581	0.0299228
chr16:22546505	NPIPB5	ductal	1.6119e-05	0.00150847
chr16:23476474	GGA2	acinar	0.000828997	0.0368699
chr16:23476578	GGA2	acinar	0.000223955	0.0134134
chr16:23477179	GGA2	beta	1.6951e-06	0.000200378
chr16:23477179	GGA2	ductal	0.00150183	0.0463659
chr16:23477179	GGA2	acinar	1.19598e-06	0.000202729
chr16:28399392	EIF3C,EIF3CL	acinar	8.415e-10	4.34784e-07
chr16:28402179	EIF3C,EIF3CL	beta	0.00100321	0.0312946
chr16:28735766	EIF3C,EIF3CL	beta	0.000170843	0.00795259
chr16:28735766	EIF3C,EIF3CL	acinar	0.000993345	0.0420953
chr16:29392876	NPIPB11	beta	0.000215368	0.00948192
chr16:29458158	BOLA2-SMG1P6	ductal	2.52873e-05	0.00210353
chr16:29472811	SULT1A3,SULT1A4	ductal	0.00164012	0.0496123
chr16:30080889	ALDOA	ductal	7.22969e-05	0.00492057
chr16:30080889	ALDOA	acinar	0.000893159	0.0389521
chr16:30212154	SULT1A3,SULT1A4	ductal	0.00125523	0.0411728
chr16:31202150	FUS	ductal	0.000983473	0.034923
chr16:426432	TMEM8A	beta	0.000499012	0.0187578
chr16:4932560	PPL	beta	0.0013463	0.0396561
chr16:5135380	ALG1,EEF2KMT	beta	1.15556e-05	0.000998224
chr16:68867504	CDH1	acinar	0.000272245	0.0155787
chr16:69390514	TERF2	beta	0.000502806	0.0188217
chr16:70010619	PDXDC2P-NPIPB14P	acinar	0.0011624	0.0462983
chr17:15457087	TVP23C,TVP23C-CDRT4	beta	5.11391e-05	0.00306289
chr17:27050912	RPL23A	ductal	2.887e-06	0.000370526
chr17:27050912	RPL23A	acinar	1.71428e-05	0.00172209
chr17:27050916	RPL23A	ductal	0.000977519	0.0348493
chr17:27050916	RPL23A	acinar	4.35704e-05	0.00362441
chr17:27869968	TAOK1	beta	0.0013149	0.0392461
chr17:2939981	RAP1GAP2	beta	2.2084e-05	0.00165335
chr17:2939981	RAP1GAP2	ductal	1.09484e-05	0.00108089
chr17:2939981	RAP1GAP2	acinar	5.39796e-06	0.000673545
chr17:32583269	CCL2	ductal	0.00013873	0.00776392
chr17:32583911	CCL2	ductal	5.90252e-07	0.000110476
chr17:38784927	SMARCE1	beta	0.000207289	0.00926508
chr17:39681475	KRT19	ductal	3.26605e-05	0.0025515
chr17:39845235	EIF1	ductal	3.17939e-08	1.06385e-05
chr17:39845235	EIF1	acinar	0.00043385	0.0228611
chr17:39983849	NT5C3B	acinar	0.00057062	0.0278611
chr17:40008495	KLHL11	ductal	0.000159556	0.00853244
chr17:46128359	NFE2L1	beta	0.000831181	0.0278632
chr17:4849289	PFN1	ductal	5.61493e-13	6.30557e-10
chr17:4849289	PFN1	acinar	2.92993e-06	0.000407794
chr17:49042216	SPAG9	ductal	8.68933e-06	0.000940542
chr17:49042216	SPAG9	acinar	0.000249395	0.0144552
chr17:49042252	SPAG9	acinar	0.000386975	0.0210702
chr17:56049824	VEZF1	ductal	3.00622e-05	0.00241142
chr17:56049829	VEZF1	beta	1.95981e-10	8.38424e-08
chr17:56049829	VEZF1	ductal	2.13938e-07	4.68786e-05
chr17:56049829	VEZF1	acinar	0.000105459	0.00703771
chr17:7123830	ACADVL	ductal	1.34073e-05	0.00129134
chr17:7123830	ACADVL	acinar	2.26652e-05	0.00212109
chr17:73038746	ATP5H	ductal	0.000875608	0.032506
chr17:73775153	H3F3B	ductal	0.000368077	0.0165573
chr17:73885939	TRIM65	ductal	5.14763e-05	0.00379068
chr17:73940077	ACOX1	acinar	0.00121349	0.0478158
chr17:73940307	ACOX1	beta	3.79358e-05	0.00245191
chr17:73940307	ACOX1	acinar	0.000435135	0.0228611
chr17:73941099	ACOX1	acinar	2.37159e-05	0.00215424
chr17:7480981	EIF4A1	acinar	0.000954741	0.0410402
chr17:79478019	ACTG1	ductal	0.000280578	0.0136995
chr17:79478019	ACTG1	acinar	1.24795e-06	0.000207623
chr17:79780692	MCRIP1	acinar	0.000105754	0.00703771
chr18:10552472	NAPG	beta	0.000966964	0.0304814
chr18:18530681	ROCK1	beta	0.000188685	0.0086048
chr18:32720919	MAPRE2	beta	0.00137833	0.0403351
chr18:48473753	ME2	beta	6.30446e-05	0.00356222
chr18:55268582	NARS	beta	4.92347e-05	0.00300901
chr18:56997185	LMAN1	beta	9.43097e-06	0.00083889
chr19:11040806	TIMM29	ductal	0.000513218	0.0214454
chr19:14590236	GIPC1	beta	0.00173146	0.0475701
chr19:17715183	UNC13A	beta	0.000568566	0.0210206
chr19:18477709	PGPEP1	ductal	0.00142028	0.0445311
chr19:18685953	UBA52	acinar	0.000103266	0.00703771
chr19:197948	LINC01002	ductal	4.32365e-06	0.000524914
chr19:197948	LINC01002	acinar	2.37445e-06	0.000349706
chr19:198045	LINC01002	ductal	2.52653e-05	0.00210353
chr19:198045	LINC01002	acinar	8.44755e-05	0.00588316
chr19:198184	LINC01002	ductal	0.000588908	0.0240488
chr19:198184	LINC01002	acinar	0.000959638	0.0410542
chr19:200781	LINC01002	beta	0.00179203	0.0486383
chr19:200782	LINC01002	acinar	5.13474e-05	0.00397677
chr19:2273066	OAZ1	beta	2.05181e-05	0.00156216
chr19:2273066	OAZ1	ductal	0.000141712	0.0077791
chr19:2273066	OAZ1	acinar	0.000500551	0.0252638
chr19:3053825	AES	beta	4.32575e-06	0.000441619
chr19:3468073	NFIC	acinar	0.000390065	0.0211105
chr19:35506729	GRAMD1A;GRAMD1A	acinar	0.000718742	0.0330427
chr19:38652993	SIPA1L3	beta	0.000989027	0.0310458
chr19:3982317	EEF2	beta	0.000130526	0.00633861
chr19:3982317	EEF2	ductal	1.56734e-06	0.000256826
chr19:3982317	EEF2	acinar	2.23992e-14	3.35391e-11
chr19:3982319	EEF2	beta	0.000165072	0.00773512
chr19:3982319	EEF2	ductal	3.19723e-08	1.06385e-05
chr19:3982319	EEF2	acinar	1.47618e-15	4.42067e-12
chr19:40875846	PLD3	beta	2.07891e-06	0.000239447
chr19:41111069	LTBP4	beta	0.00149973	0.0427734
chr19:42375477	RPS19	ductal	0.000189719	0.00981214
chr19:42375477	RPS19	acinar	2.32244e-07	5.08897e-05
chr19:45165571	PVR	ductal	9.48018e-11	5.67799e-08
chr19:45165576	PVR	ductal	2.55193e-06	0.000352716
chr19:45165662	PVR	ductal	4.63244e-06	0.000554905
chr19:45165758	PVR	ductal	0.000226342	0.0114239
chr19:45168081	PVR	ductal	1.30587e-10	7.33245e-08
chr19:45168642	PVR	ductal	9.31722e-06	0.000980044
chr19:49999700	RPS11	ductal	0.000324223	0.0150145
chr19:49999700	RPS11	acinar	8.23096e-07	0.000150912
chr19:51302066	C19orf48	acinar	0.000425602	0.0226249
chr19:52535016	ZNF432	ductal	1.04458e-05	0.00105444
chr19:52535088	ZNF432	ductal	0.000840288	0.0314548
chr19:5691638	RPL36	acinar	0.000850792	0.0372855
chr19:7585273	ZNF358	acinar	1.72516e-05	0.00172209
chr19:8387207	RPS28	acinar	9.18744e-06	0.00108583
chr2:106509907	NCK2	ductal	0.00163849	0.0496123
chr2:107039712	RGPD3	beta	2.03075e-05	0.00155934
chr2:109276099	LIMS1	ductal	2.28293e-05	0.00199125
chr2:109276178	LIMS1	ductal	0.000699648	0.0275686
chr2:109293130	LIMS1	beta	0.000881691	0.028804
chr2:109293130	LIMS1	ductal	1.05743e-05	0.00105556
chr2:109367871	RANBP2	beta	0.000175032	0.00810562
chr2:110581913	RGPD5,RGPD6	beta	0.000934854	0.0298887
chr2:110585506	RGPD5,RGPD6	beta	0.000135819	0.00651001
chr2:110585506	RGPD5,RGPD6	ductal	7.8912e-05	0.00525145
chr2:110593829	RGPD5,RGPD6	beta	0.000198015	0.00893951
chr2:110605494	RGPD5,RGPD6	beta	0.00013464	0.00650328
chr2:110605494	RGPD5,RGPD6	ductal	0.000420246	0.0182391
chr2:110613537	RGPD5,RGPD6	beta	3.84319e-05	0.00246623
chr2:110613607	RGPD5,RGPD6	beta	1.25713e-08	2.89592e-06
chr2:110613607	RGPD5,RGPD6	ductal	2.11102e-06	0.000310908
chr2:110613779	RGPD5,RGPD6	beta	0.00172305	0.0474842
chr2:110613779	RGPD5,RGPD6	ductal	7.5882e-05	0.00508749
chr2:110614098	RGPD5,RGPD6	beta	7.37884e-08	1.35289e-05
chr2:110614098	RGPD5,RGPD6	ductal	0.00102296	0.035892
chr2:110614271	RGPD5,RGPD6	beta	1.6294e-07	2.71083e-05
chr2:110614271	RGPD5,RGPD6	ductal	1.74384e-06	0.000274853
chr2:110614893	RGPD5,RGPD6	beta	3.3844e-05	0.00225226
chr2:110842638	MALL	acinar	0.00129462	0.0499178
chr2:111271768	RGPD5,RGPD6	beta	1.78425e-05	0.00143122
chr2:111272390	RGPD5,RGPD6	beta	1.40785e-06	0.000175668
chr2:111272390	RGPD5,RGPD6	ductal	8.1745e-05	0.00536056
chr2:111272563	RGPD5,RGPD6	beta	4.37352e-07	6.44126e-05
chr2:111272563	RGPD5,RGPD6	ductal	0.00109056	0.0378284
chr2:111272726	RGPD5,RGPD6	ductal	0.00115489	0.0391709
chr2:111272882	RGPD5,RGPD6	beta	3.93022e-06	0.000406832
chr2:111272882	RGPD5,RGPD6	ductal	6.80222e-05	0.0047373
chr2:111273054	RGPD5,RGPD6	beta	1.28699e-06	0.00016285
chr2:111273054	RGPD5,RGPD6	ductal	2.02143e-06	0.000302676
chr2:111273124	RGPD5,RGPD6	beta	1.13054e-06	0.000145674
chr2:111273208	RGPD5,RGPD6	ductal	0.000855213	0.0318806
chr2:111281167	RGPD5,RGPD6	beta	0.000341692	0.0138278
chr2:111281167	RGPD5,RGPD6	ductal	0.000528457	0.0219799
chr2:111292832	RGPD5,RGPD6	beta	0.000698135	0.0239391
chr2:111301009	RGPD5,RGPD6	ductal	4.10099e-05	0.00309607
chr2:111301155	RGPD5,RGPD6	beta	7.40407e-05	0.00408087
chr2:111301155	RGPD5,RGPD6	ductal	0.00018622	0.00978365
chr2:111304748	RGPD5,RGPD6	beta	3.28255e-06	0.000355306
chr2:113135724	RGPD5,RGPD8	beta	1.8734e-05	0.0014723
chr2:113135724	RGPD5,RGPD8	ductal	0.000111594	0.00659581
chr2:113155572	RGPD5,RGPD8	ductal	0.00116324	0.0392158
chr2:113155718	RGPD5,RGPD8	beta	4.37532e-05	0.00273028
chr2:113155718	RGPD5,RGPD8	ductal	2.47545e-05	0.00210353
chr2:113159311	RGPD5,RGPD8	beta	0.000340143	0.0138274
chr2:114355998	WASH2P	ductal	0.000879953	0.0325329
chr2:122097295	CLASP1	beta	7.4533e-07	0.000103016
chr2:131100496	IMP4	ductal	0.000190039	0.00981214
chr2:160088793	TANC1	beta	0.000116017	0.00579056
chr2:170939368	UBR3	acinar	0.000417769	0.0223407
chr2:178087165	HNRNPA3	beta	0.00114873	0.0348654
chr2:190636411	ORMDL1	beta	3.72875e-07	5.67782e-05
chr2:191799592	GLS	alpha	4.84453e-06	0.00870465
chr2:191799592	GLS	ductal	0.000776358	0.0297882
chr2:208619742	CCNYL1	beta	0.00108689	0.0332129
chr2:208619742	CCNYL1	acinar	0.000847481	0.0372855
chr2:217366186	RPL37A	ductal	6.83213e-06	0.000762014
chr2:217366186	RPL37A	acinar	1.06278e-07	2.89333e-05
chr2:218386	SH3YL1	acinar	0.000281132	0.0158849
chr2:224740332	WDFY1	beta	0.000747673	0.0253475
chr2:232577515	PTMA	ductal	3.6969e-06	0.000454973
chr2:232577515	PTMA	acinar	0.000143661	0.00928524
chr2:232577516	PTMA	ductal	9.04484e-05	0.00569669
chr2:241616119	AQP12B	acinar	0.000328036	0.0180802
chr2:242212177	HDLBP	acinar	2.1583e-07	4.84754e-05
chr2:242512138	BOK	ductal	1.40388e-07	3.23396e-05
chr2:242512138	BOK	acinar	1.92336e-09	8.63975e-07
chr2:242512630	BOK	acinar	3.77183e-06	0.000505763
chr2:29025479	PPP1CB	beta	4.84497e-05	0.00298132
chr2:29025479	PPP1CB	acinar	0.000274846	0.015628
chr2:32157184	MEMO1	beta	1.04683e-05	0.000922032
chr2:32157184	MEMO1	ductal	3.00693e-07	6.00318e-05
chr2:47403641	CALM2	ductal	0.000588326	0.0240488
chr2:48603483	FOXN2	beta	8.37622e-06	0.000783875
chr2:70033584	ANXA4	ductal	0.00121303	0.0402137
chr2:71411329	PAIP2B	acinar	0.000898072	0.0389772
chr2:87820986	CYTOR	ductal	5.95537e-05	0.00428024
chr20:17588046	DSTN	beta	0.000577874	0.0211041
chr20:17588046	DSTN	ductal	2.55271e-05	0.00210399
chr20:17588046	DSTN	acinar	3.51066e-05	0.00302095
chr20:25288632	ABHD12	beta	0.000299511	0.0124
chr20:25288632	ABHD12	acinar	0.000294194	0.0164821
chr20:34219496	CPNE1	beta	2.19923e-06	0.000246974
chr20:36147572	BLCAP	ductal	0.0013233	0.0429189
chr20:43530234	YWHAB	ductal	0.00142258	0.0445311
chr20:44802728	CDH22	ductal	0.00157042	0.0482272
chr20:62906433	PCMTD2	alpha	1.13021e-06	0.00253846
chr20:62906514	PCMTD2	beta	0.000385627	0.0153976
chr21:27253591	APP	beta	0.00115405	0.0349091
chr21:34728136	IFNAR1	acinar	1.45509e-06	0.000237683
chr21:34923319	SON	ductal	0.000217873	0.0110586
chr21:45404338	AGPAT3	beta	0.00141267	0.0408083
chr22:18075263	ATP6V1E1	beta	0.000136229	0.00651001
chr22:21065645	PI4KA	beta	0.000286446	0.0119695
chr22:21066789	PI4KA	ductal	0.00147922	0.0459838
chr22:21832094	PI4KAP2	ductal	1.91993e-05	0.00176007
chr22:36056732	APOL6	ductal	0.000135438	0.00765265
chr22:42486682	NDUFA6	ductal	0.00029983	0.0142522
chr22:43266363	PACSIN2	acinar	1.93218e-06	0.000289312
chr22:43278220	PACSIN2	acinar	2.99954e-06	0.000408301
chr22:47082159	CERK	beta	1.72671e-05	0.00139755
chr22:51223684	RPL23AP82	acinar	1.62437e-05	0.00165833
chr3:10193475	VHL	ductal	5.23383e-05	0.00379199
chr3:10194373	VHL	ductal	0.00120478	0.0402137
chr3:10194555	VHL	ductal	0.00137391	0.0440828
chr3:10194555	VHL	acinar	0.000178328	0.0111257
chr3:119545199	GSK3B	beta	1.04357e-06	0.000137874
chr3:119545199	GSK3B	ductal	9.07666e-06	0.00097077
chr3:120321150	NDUFB4	beta	2.95917e-08	6.3298e-06
chr3:120321150	NDUFB4	ductal	6.77089e-05	0.0047373
chr3:120321150	NDUFB4	acinar	0.00108137	0.0445642
chr3:125725455	SLC41A3	acinar	4.03761e-06	0.000525709
chr3:127790249	SEC61A1	acinar	2.94738e-09	1.2036e-06
chr3:148559640	CPB1	acinar	3.15548e-07	6.44292e-05
chr3:14986435	FGD5-AS1	beta	1.93767e-05	0.00150069
chr3:14986435	FGD5-AS1	ductal	0.00011425	0.00666859
chr3:14986435	FGD5-AS1	acinar	1.28845e-05	0.00135019
chr3:14986453	FGD5-AS1	beta	0.00145025	0.0417596
chr3:150264003	SERP1	beta	3.92526e-05	0.00250103
chr3:156259229	SSR3	beta	7.42421e-09	1.85275e-06
chr3:156259229	SSR3	acinar	3.40542e-15	7.64858e-12
chr3:156259288	SSR3	beta	0.000841584	0.0279959
chr3:156259288	SSR3	acinar	3.65244e-11	2.73446e-08
chr3:156259295	SSR3	beta	0.000274209	0.0115425
chr3:156259295	SSR3	acinar	2.75197e-09	1.17732e-06
chr3:156259340	SSR3	acinar	8.05133e-05	0.00574073
chr3:156259406	SSR3	acinar	3.65119e-09	1.42619e-06
chr3:156259407	SSR3	acinar	8.00731e-10	4.34784e-07
chr3:184040490	EIF4G1	ductal	1.34934e-06	0.000233125
chr3:190024457	CLDN1	ductal	0.000110915	0.00659581
chr3:23961155	RPL15	ductal	0.000536364	0.022206
chr3:32411483	CMTM8	beta	8.7639e-08	1.54866e-05
chr3:39438321	SLC25A38	beta	0.000194315	0.0088168
chr3:44791062	KIAA1143	beta	1.56985e-06	0.000192243
chr3:44791062	KIAA1143	ductal	0.000147402	0.00802583
chr3:44791062	KIAA1143	acinar	0.000562703	0.0276247
chr3:48787042	PRKAR2A	beta	0.0002349	0.0100016
chr3:48787856	PRKAR2A	acinar	1.93524e-05	0.0018898
chr3:49397323	RHOA	beta	0.000683812	0.0236283
chr3:49397323	RHOA	ductal	2.50593e-05	0.00210353
chr3:49397323	RHOA	acinar	1.96922e-07	4.65564e-05
chr3:49398498	RHOA	beta	9.99929e-05	0.00528433
chr3:49398498	RHOA	ductal	5.85674e-08	1.64428e-05
chr3:49398498	RHOA	acinar	1.04772e-05	0.00117218
chr3:53269046	TKT	acinar	6.14488e-05	0.00456245
chr3:58141791	FLNB	acinar	1.28737e-05	0.00135019
chr3:62423807	CADPS	beta	9.76124e-12	6.74577e-09
chr3:69105176	UBA3	beta	5.29193e-09	1.39832e-06
chr3:69105176	UBA3	ductal	9.40182e-05	0.00578534
chr4:10099340	WDR1	ductal	0.00135292	0.0436633
chr4:103553053	MANBA	beta	0.000462464	0.0177555
chr4:109541740	RPL34	acinar	0.000720878	0.0330427
chr4:109541867	RPL34	acinar	1.74168e-06	0.00026978
chr4:109546362	RPL34	acinar	1.66771e-07	4.04939e-05
chr4:16163486	TAPT1	beta	0.00183783	0.0492867
chr4:166403414	CPE	beta	1.55654e-05	0.00128293
chr4:170634240	CLCN3	beta	5.85983e-07	8.22573e-05
chr4:170642781	CLCN3	beta	0.000915968	0.0294948
chr4:177252238	SPCS3	beta	1.92705e-09	6.65868e-07
chr4:177252238	SPCS3	ductal	3.08445e-05	0.00243076
chr4:177252238	SPCS3	acinar	1.16954e-07	3.09033e-05
chr4:185687863	ACSL1	beta	2.80542e-05	0.00200031
chr4:190878580	FRG1	ductal	2.06252e-05	0.0018407
chr4:190881971	FRG1	ductal	4.03208e-09	1.81121e-06
chr4:190883001	FRG1	ductal	1.63325e-09	7.72271e-07
chr4:190883051	FRG1	ductal	1.69185e-07	3.7999e-05
chr4:57326126	PAICS	beta	0.00178938	0.0486383
chr4:57326126	PAICS	acinar	4.32266e-05	0.00362441
chr4:57326131	PAICS	beta	7.1234e-05	0.00395041
chr4:57326262	PAICS	beta	2.50841e-05	0.00184903
chr4:57326262	PAICS	acinar	0.000167482	0.0105984
chr4:57326291	PAICS	acinar	6.44849e-05	0.00474863
chr4:57326875	PAICS	ductal	0.00100285	0.0354709
chr4:57326875	PAICS	acinar	1.29248e-05	0.00135019
chr4:57326879	PAICS	beta	0.000587942	0.0212131
chr4:57326879	PAICS	acinar	1.68221e-06	0.00026514
chr4:57327017	PAICS	beta	0.000105217	0.0054326
chr4:57327017	PAICS	acinar	7.82358e-05	0.00562296
chr4:6644273	MRFAP1	ductal	0.00130437	0.0426126
chr4:71850064	MOB1B	beta	0.000113895	0.00571638
chr4:74703999	CXCL6	ductal	0.000976821	0.0348493
chr4:77979680	CCNI	beta	4.77685e-21	2.14576e-17
chr4:77979680	CCNI	ductal	6.6999e-08	1.824e-05
chr4:77979680	CCNI	acinar	4.5776e-05	0.00373865
chr4:83821324	THAP9-AS1	ductal	0.00116984	0.0392158
chr4:95588075	PDLIM5	beta	0.000179364	0.00826363
chr5:132029860	KIF3A	beta	0.000231613	0.00995603
chr5:170837533	NPM1	beta	0.00103014	0.0318033
chr5:170837533	NPM1	ductal	8.00441e-11	5.53166e-08
chr5:170837533	NPM1	acinar	4.19765e-07	8.1982e-05
chr5:180262080	LINC00847	beta	8.82969e-06	0.000808003
chr5:180750947	LOC100132062,LOC100132287,LOC100133331	ductal	6.74531e-07	0.000123673
chr5:180750947	LOC100132062,LOC100132287,LOC100133331	acinar	0.000693245	0.0325307
chr5:180751128	LOC100132062,LOC100132287,LOC100133331	ductal	0.000189927	0.00981214
chr5:180751155	LOC100132062,LOC100132287,LOC100133331	ductal	0.000267816	0.0132201
chr5:180753114	LOC100132062,LOC100132287,LOC100133331	ductal	2.20996e-05	0.0019465
chr5:180753114	LOC100132062,LOC100132287,LOC100133331	acinar	0.000116355	0.00763014
chr5:180753128	LOC100132062,LOC100132287,LOC100133331	beta	0.00148029	0.0423533
chr5:180753917	LOC100132062,LOC100132287,LOC100133331	acinar	0.000806383	0.0360425
chr5:180754153	LOC100132062,LOC100132287,LOC100133331	acinar	0.000227709	0.0134501
chr5:33468087	TARS	beta	4.33087e-05	0.00273028
chr5:40832583	RPL37	beta	0.00105952	0.0325985
chr5:40832583	RPL37	ductal	0.000171389	0.00905739
chr5:40832583	RPL37	acinar	5.50841e-05	0.00415862
chr5:70344903	GTF2H2	beta	6.35478e-08	1.21471e-05
chr5:81474405	ATG10	beta	5.56547e-09	1.42858e-06
chr6:116572828	TSPYL4	beta	1.60648e-08	3.60816e-06
chr6:116572828	TSPYL4	acinar	7.28098e-05	0.00527519
chr6:133138699	RPS12	acinar	1.79407e-05	0.0017712
chr6:133138701	RPS12	acinar	0.000619043	0.0299005
chr6:139501341	HECA	beta	0.000105834	0.00543321
chr6:160100882	SOD2	ductal	6.48508e-06	0.000746948
chr6:160101677	SOD2	ductal	2.28036e-06	0.000325186
chr6:160113321	SOD2	acinar	0.000229644	0.0134501
chr6:160200026	ACAT2,TCP1	beta	0.00178185	0.0486383
chr6:166755975	SFT2D1	beta	0.000105096	0.0054326
chr6:170862300	PSMB1	ductal	0.000129422	0.00740592
chr6:2959513	SERPINB6	acinar	0.00111621	0.0453759
chr6:33244255	RPS18	ductal	0.000107034	0.00645364
chr6:33244255	RPS18	acinar	2.44254e-10	1.46292e-07
chr6:33420474	SYNGAP1	acinar	4.81108e-05	0.00382503
chr6:34385242	RPS10	acinar	0.0001534	0.00984387
chr6:35542476	FKBP5	acinar	0.00120887	0.0478158
chr6:36108576	MAPK13	beta	6.261e-06	0.000604826
chr6:36108576	MAPK13	ductal	1.63317e-05	0.00151262
chr6:36108627	MAPK13	beta	6.05296e-06	0.00059758
chr6:36108633	MAPK13	ductal	1.36551e-05	0.00129134
chr6:36108633	MAPK13	acinar	0.000167517	0.0105984
chr6:36108692	MAPK13	beta	0.00047383	0.0180377
chr6:36108692	MAPK13	ductal	0.000370438	0.0165573
chr6:36108692	MAPK13	acinar	9.83898e-05	0.00679949
chr6:36109196	MAPK13	acinar	0.00076389	0.0343139
chr6:36109330	MAPK13	ductal	0.000917267	0.0334989
chr6:42175927	MRPS10	beta	4.59044e-07	6.6517e-05
chr6:42856905	RPL7L1	beta	1.80057e-05	0.00143154
chr6:42856905	RPL7L1	ductal	2.24736e-08	8.41262e-06
chr6:42856905	RPL7L1	acinar	4.95132e-08	1.43493e-05
chr6:42856917	RPL7L1	beta	4.46096e-09	1.25241e-06
chr6:42856917	RPL7L1	ductal	0.000234468	0.0116379
chr6:42856917	RPL7L1	acinar	2.41077e-07	5.15674e-05
chr6:42856983	RPL7L1	beta	9.83049e-07	0.000131817
chr6:42856983	RPL7L1	ductal	0.000705809	0.0276899
chr6:42856983	RPL7L1	acinar	1.43122e-07	3.67375e-05
chr6:42857023	RPL7L1	beta	0.000648033	0.0227419
chr6:42857023	RPL7L1	ductal	0.000938612	0.0339898
chr6:42857023	RPL7L1	acinar	5.11648e-05	0.00397677
chr6:42857031	RPL7L1	beta	2.83868e-05	0.00200808
chr6:42857031	RPL7L1	ductal	0.000350548	0.0161479
chr6:42857031	RPL7L1	acinar	2.8342e-08	9.56785e-06
chr6:42857111	RPL7L1	acinar	0.00124455	0.0485989
chr6:46113855	ENPP4	acinar	0.00110453	0.0451198
chr6:7282979	SSR1	beta	0.00183193	0.0492867
chr6:7288341	SSR1	beta	3.52668e-05	0.00232968
chr6:74303543	SLC17A5	beta	0.000216362	0.00948192
chr6:86387888	SNHG5	acinar	0.000295372	0.0164821
chr6:87968565	ZNF292	beta	3.30975e-05	0.0022357
chr7:102123730	RASA4B	beta	0.000444225	0.0172767
chr7:102123909	RASA4B	ductal	0.000616478	0.0248108
chr7:102124103	RASA4B	ductal	0.000807131	0.0304675
chr7:102135806	RASA4B	beta	3.41622e-08	6.9753e-06
chr7:102220287	RASA4	ductal	0.000675865	0.0267488
chr7:102222909	RASA4,RASA4B	beta	0.00014884	0.00707501
chr7:102224698	RASA4,RASA4B	beta	0.000290197	0.01207
chr7:102224722	RASA4,RASA4B	ductal	0.00125572	0.0411728
chr7:102307567	POLR2J2	acinar	0.00114738	0.0462983
chr7:128293894	LINC01000	ductal	0.000139342	0.00776392
chr7:129395751	NRF1	beta	0.000923711	0.0296379
chr7:129916515	CPA2	acinar	0.00103888	0.0434108
chr7:142460335	PRSS1	acinar	2.33456e-12	2.33041e-09
chr7:142460369	PRSS1	acinar	1.37895e-12	1.54856e-09
chr7:142460865	PRSS1	acinar	1.68376e-09	7.96151e-07
chr7:142482291	PRSS3P2	acinar	4.01385e-08	1.24346e-05
chr7:142482292	PRSS3P2	acinar	2.87547e-08	9.56785e-06
chr7:150034184	LRRC61	beta	0.00183692	0.0492867
chr7:1586239	TMEM184A	acinar	4.41098e-05	0.00363562
chr7:17384818	AHR	ductal	7.05041e-06	0.00077245
chr7:17384832	AHR	ductal	8.64355e-05	0.00554669
chr7:23314547	GPNMB	beta	0.000130387	0.00633861
chr7:42962958	PSMA2	ductal	0.000306651	0.0144997
chr7:44099664	DBNL	acinar	0.000522649	0.0260688
chr7:5662192	RNF216	ductal	4.34853e-05	0.0032556
chr7:6502367	KDELR2	beta	9.62646e-09	2.33741e-06
chr7:6844681	CCZ1B	beta	0.00160343	0.044876
chr7:72418618	POM121	beta	0.00101102	0.031429
chr7:72418618	POM121	ductal	0.000478731	0.0201921
chr7:72593152	GTF2IP1,GTF2IP4	beta	0.00015874	0.00750589
chr7:72593152	GTF2IP1,GTF2IP4	acinar	0.000447407	0.0231882
chr7:72605481	GTF2IP1,GTF2IP4	beta	8.26597e-07	0.000112517
chr7:72613800	GTF2IP1,GTF2IP4	beta	8.25041e-05	0.00449222
chr7:72614562	GTF2IP1,GTF2IP4	beta	0.000616561	0.0219809
chr7:74168251	GTF2I	beta	0.000418773	0.0164291
chr7:74171175	GTF2I	beta	5.90375e-11	3.11996e-08
chr7:74171175	GTF2I	ductal	0.000131309	0.00746636
chr7:74171175	GTF2I	acinar	1.2094e-05	0.00130906
chr7:74174155	GTF2I	beta	0.00106534	0.0326656
chr7:74536756	GTF2IRD2,GTF2IRD2B	ductal	0.000139999	0.00776392
chr7:74607876	GTF2IP1,GTF2IP4	beta	0.000991778	0.0310458
chr7:74608637	GTF2IP1,GTF2IP4	beta	1.48982e-05	0.00125969
chr7:74616954	GTF2IP1,GTF2IP4	beta	2.80007e-06	0.000306779
chr7:74629283	GTF2IP1,GTF2IP4	beta	0.000103036	0.00541333
chr7:77423152	TMEM60	beta	0.000119856	0.00594907
chr7:91742728	CYP51A1	beta	5.013e-08	9.79061e-06
chr7:91742728	CYP51A1	acinar	6.06617e-05	0.00454154
chr7:95213953	PDK4	alpha	4.8406e-05	0.0344741
chr7:99172900	ZNF655	beta	5.67314e-07	8.09008e-05
chr8:103841636	AZIN1	alpha	4.86011e-08	0.000218316
chr8:103841636	AZIN1	ductal	3.59045e-07	7.01231e-05
chr8:125568623	MTSS1	beta	0.00162133	0.0452362
chr8:145487343	BOP1	acinar	0.00100646	0.0422525
chr8:17928850	ASAH1	beta	0.000717465	0.0245084
chr8:17928850	ASAH1	ductal	0.00124462	0.0411091
chr8:26269412	BNIP3L	beta	7.11922e-06	0.000673254
chr8:26515458	DPYSL2	beta	5.50408e-05	0.00321095
chr8:27457489	CLU	beta	0.000620591	0.0220006
chr8:30535980	GSR	ductal	3.06017e-06	0.000387219
chr8:30535980	GSR	acinar	0.000198524	0.0120509
chr8:30536015	GSR	beta	2.61308e-05	0.00190861
chr8:30536015	GSR	ductal	0.000399415	0.0176466
chr8:30536015	GSR	acinar	4.79783e-05	0.00382503
chr8:30536016	GSR	beta	5.05028e-05	0.00305645
chr8:30536016	GSR	ductal	0.00114495	0.039111
chr8:30536016	GSR	acinar	1.48936e-06	0.000238937
chr8:30536078	GSR	beta	8.90387e-06	0.000808003
chr8:30536078	GSR	ductal	2.49779e-05	0.00210353
chr8:30536078	GSR	acinar	1.78427e-08	6.41195e-06
chr8:30536151	GSR	beta	1.56043e-14	2.33649e-11
chr8:30536151	GSR	ductal	1.57704e-13	2.02402e-10
chr8:30536151	GSR	acinar	1.21491e-15	4.42067e-12
chr8:30536152	GSR	beta	1.43684e-14	2.33649e-11
chr8:30536152	GSR	ductal	7.38108e-12	6.63117e-09
chr8:30536152	GSR	acinar	2.42257e-11	1.97858e-08
chr8:30536544	GSR	beta	2.05695e-09	6.78913e-07
chr8:30536544	GSR	ductal	6.69088e-06	0.000760897
chr8:30536544	GSR	acinar	3.31872e-08	1.06483e-05
chr8:30643163	PPP2CB	beta	0.00016531	0.00773512
chr8:30651589	PPP2CB	beta	0.000799472	0.0270017
chr8:30651589	PPP2CB	ductal	0.00111802	0.0383369
chr8:30651593	PPP2CB	beta	8.79677e-06	0.000808003
chr8:38828267	PLEKHA2	ductal	6.13234e-05	0.00437245
chr8:38830536	PLEKHA2	ductal	0.000289808	0.0139232
chr8:42884565	HOOK3	ductal	6.01025e-06	0.000701248
chr8:48890109	MCM4	ductal	0.000618614	0.0248108
chr8:74202888	RPL7	acinar	4.1913e-08	1.25515e-05
chr8:95274357	GEM	ductal	0.000721762	0.0280706
chr8:98740895	MTDH	beta	3.52017e-06	0.00037649
chr8:98740895	MTDH	ductal	2.7128e-06	0.000363759
chr9:113006439	TXN	ductal	2.95819e-05	0.00239427
chr9:130703719	FAM102A	ductal	0.00140436	0.0444794
chr9:131457014	SET	beta	2.34318e-06	0.00025989
chr9:131457014	SET	ductal	9.20032e-05	0.00573998
chr9:135944524	CEL	acinar	3.91591e-07	7.8179e-05
chr9:136229572	SURF4	acinar	0.000452275	0.0232185
chr9:136421044	ADAMTSL2	beta	0.00101767	0.0315266
chr9:139335882	SEC16A	beta	1.6335e-05	0.00133412
chr9:139335882	SEC16A	ductal	4.33685e-08	1.25685e-05
chr9:139335882	SEC16A	acinar	1.03459e-06	0.000178746
chr9:17727	WASHC1	beta	0.000848476	0.0280247
chr9:17810	WASHC1	beta	0.00175034	0.0479421
chr9:17810	WASHC1	acinar	1.8633e-06	0.000283728
chr9:17829	WASHC1	ductal	2.85871e-05	0.00233478
chr9:17843	WASHC1	ductal	1.03898e-05	0.00105444
chr9:35404840	UNC13B	beta	0.00159958	0.044876
chr9:36215309	GNE	beta	0.000663907	0.0231184
chr9:36215309	GNE	ductal	7.63178e-07	0.000134439
chr9:36216026	GNE	ductal	0.000412274	0.0179799
chr9:46687929	FGF7P6,LOC102724238,LOC554249	beta	0.000331728	0.0135466
chr9:46688032	FGF7P6,LOC102724238,LOC554249	beta	0.000391074	0.015546
chr9:70483224	CBWD5	beta	1.06385e-08	2.51517e-06
chr9:70483224	CBWD5	ductal	2.0274e-05	0.00183982
chr9:79002061	RFK	beta	0.000613008	0.0219719
