# Supplementary material for: Detecting cell-type-specific allelic expression imbalance by integrative analysis of bulk and single-cell RNA sequencing data
Source: PLoS Genet. 2021 Mar 4;17(3):e1009080. doi: 10.1371/journal.pgen.1009080 (PMC7963069; doi:10.1371/journal.pgen.1009080)
Supplement: S4 Table — We applied BSCET to the Fadista pancreatic islets bulk RNA-seq data [15] using the MuSiC [14] proportion estimates obtained from the Segerstolpe single-cell reference [16]. We detected 8 SNPs in 8 genes with cell-type-specific AEI significantly associated with HbA1c (FDR adjusted P-value < 0.05), with the direction of the association indicated in column ‘Correlation’. (XLSX) [file pgen.1009080.s014.xlsx]

## Sheet: BSCET
SNP	Gene	Cell Type	Correlation	P-value	FDR Adjusted P-value
chr11:118919206	HYOU1	acinar	Positive	4.784e-05	0.03432
chr12:120763699	PLA2G1B	ductal	Positive	7.755e-06	0.01298
chr12:120763699	PLA2G1B	acinar	Negative	6.864e-06	0.008616
chr15:40845952	CCDC32	acinar	Positive	5.971e-06	0.008616
chr17:32583269	CCL2	alpha	Positive	2.569e-06	0.0129
chr2:37872139	CDC42EP3	acinar	Positive	2.98e-05	0.02494
chr5:145523105	LARS	ductal	Positive	5.533e-06	0.01298
chr5:145523105	LARS	acinar	Negative	2.716e-06	0.006819
chr8:118185025	SLC30A8	acinar	Negative	2.004e-05	0.02012
chr9:135944524	CEL	ductal	Positive	2.634e-07	0.001322
chr9:135944524	CEL	acinar	Negative	1.168e-06	0.005866
